# Supplementary material for: The clinical epidemiology of young adults starting renal replacement therapy in the UK: presentation, management and survival using 15 years of UK Renal Registry data
Source: PubMed Central journal article supplement — Nephrol Dial Transplant. 2017 Feb 23;33(2):356–64. doi: 10.1093/ndt/gfw444 (PMC5837389; doi:10.1093/ndt/gfw444), 2017-02-23
Supplement: gfw444_supplementary_data.pdf [file gfw444_supplementary_data.pdf]

Supplementary figure 1. Unadjusted 5 years KM survival by age group at RRT start for UK incident young adults

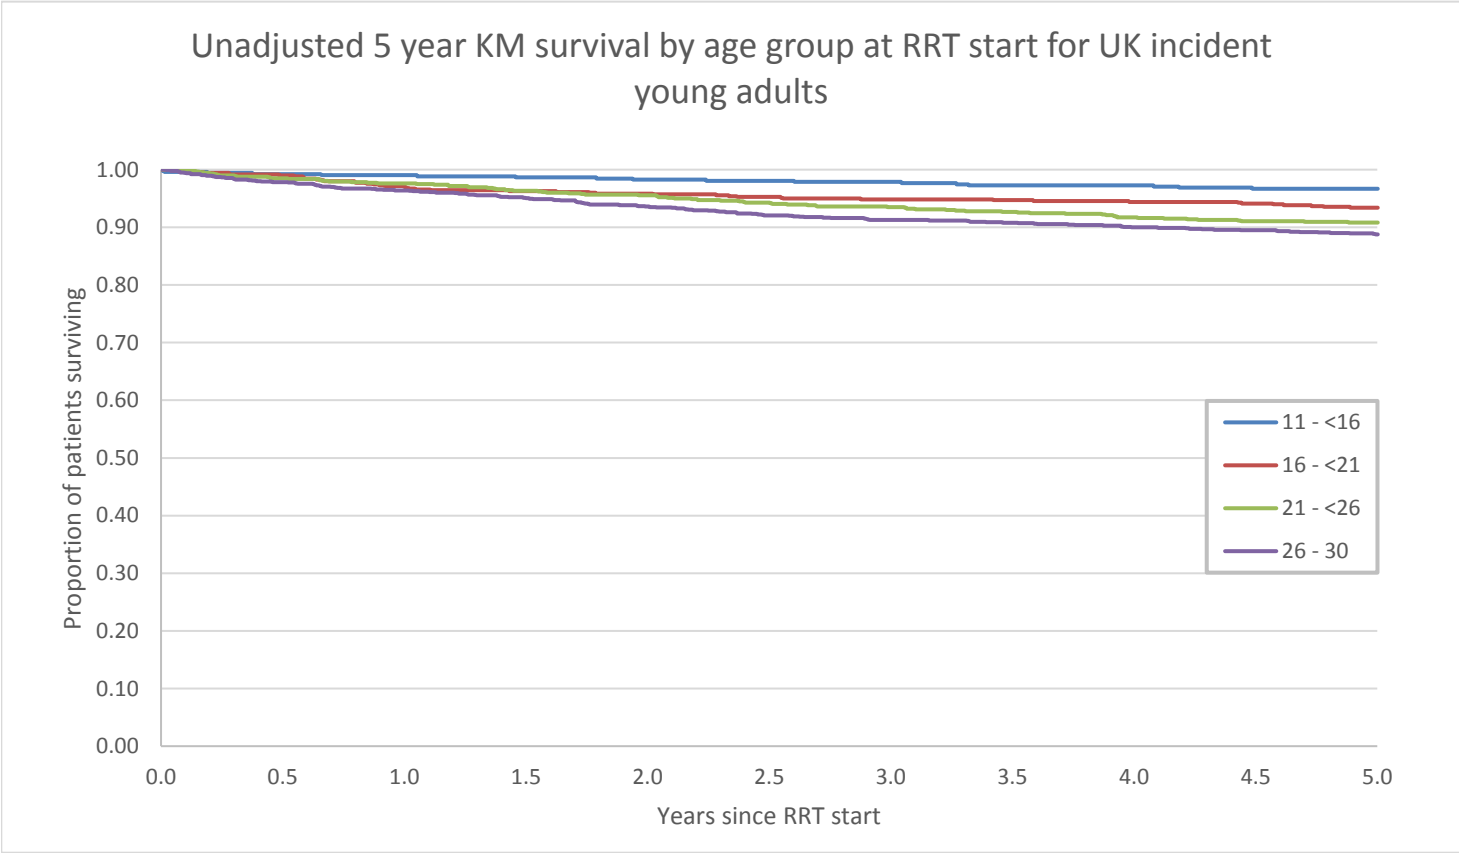

Supplementary table 1. Details of inclusion criteria data queries

| Type and number                                 | Outcome                                                                                                                             | Total                                            |
|-------------------------------------------------|-------------------------------------------------------------------------------------------------------------------------------------|--------------------------------------------------|
| <b>Missing data</b>                             |                                                                                                                                     |                                                  |
| 23 missing paediatric start date                | 10 excluded:<br>- 5 started RRT outside study window;<br>- 1 non UK patient;<br>- 4 no data                                         |                                                  |
| 1 incomplete biochemistry, ?recovered           | 0 excluded                                                                                                                          | <b>17 excluded<br/>on missing<br/>data</b>       |
| 1 transplant patient missing treatment at start | 0 excluded                                                                                                                          |                                                  |
| 1 missing RRT data                              | 1 excluded:<br>- no data                                                                                                            |                                                  |
| 22 missing adult renal registry number          | 6 excluded:<br>- 1 private living related kidney donation with no UK follow up;<br>- 4 unknown start;<br>- 1 unconfirmed RRT status |                                                  |
| <b>Discordant between databases</b>             |                                                                                                                                     |                                                  |
| 6 discordant start dates                        | 1 excluded:<br>- started RRT outside study window                                                                                   | <b>3 excluded<br/>on<br/>discordant<br/>data</b> |
| 2 first dynamic data date before start date     | 2 excluded:<br>- 2 started RRT before start date                                                                                    |                                                  |

RRT - renal replacement therapy

Supplementary table 2. Clinical epidemiology of UK incident young adults starting RRT by age group

|                                           | 11 - <16   | 16 - <21   | 21 - <26   | 26 - 30     | Total<br>%  |
|-------------------------------------------|------------|------------|------------|-------------|-------------|
|                                           | N          |            |            |             |             |
|                                           | %          |            |            |             |             |
| <b>Age group</b>                          | <b>516</b> | <b>702</b> | <b>887</b> | <b>1265</b> | <b>3370</b> |
|                                           | 15.3       | 20.8       | 26.3       | 37.5        | 100.0       |
| <b>Gender</b>                             |            |            |            |             |             |
| Male                                      | <b>292</b> | <b>408</b> | <b>534</b> | <b>718</b>  | <b>1952</b> |
|                                           | 56.6       | 58.1       | 60.2       | 56.8        | 57.9        |
| Female                                    | <b>224</b> | <b>294</b> | <b>353</b> | <b>547</b>  | <b>1418</b> |
|                                           | 43.4       | 41.9       | 39.8       | 43.2        | 42.1        |
| <b>Ethnicity*</b>                         |            |            |            |             |             |
| White                                     | <b>400</b> | <b>574</b> | <b>699</b> | <b>971</b>  | <b>2644</b> |
|                                           | 77.5       | 81.8       | 78.8       | 76.8        | 78.5        |
| Asian                                     | <b>86</b>  | <b>64</b>  | <b>93</b>  | <b>145</b>  | <b>388</b>  |
|                                           | 16.7       | 9.1        | 10.5       | 11.5        | 11.5        |
| Black                                     | <b>15</b>  | <b>37</b>  | <b>59</b>  | <b>88</b>   | <b>199</b>  |
|                                           | 2.9        | 5.3        | 6.7        | 7.0         | 5.9         |
| Other                                     | <b>13</b>  | <b>22</b>  | <b>25</b>  | <b>45</b>   | <b>105</b>  |
|                                           | 2.5        | 3.1        | 2.8        | 3.6         | 3.1         |
| Missing                                   | <b>2</b>   | <b>5</b>   | <b>11</b>  | <b>16</b>   | <b>34</b>   |
|                                           | 0.4        | 0.7        | 1.2        | 1.3         | 1.0         |
| Discordant                                | <b>22</b>  | <b>2</b>   | -          | -           | <b>24</b>   |
|                                           | 4.3        | 0.3        | -          | -           | 0.7         |
| <b>Primary renal diagnosis**</b>          |            |            |            |             |             |
| Glomerular Disease                        | <b>121</b> | <b>199</b> | <b>287</b> | <b>373</b>  | <b>980</b>  |
|                                           | 23.4       | 28.3       | 32.4       | 29.5        | 29.1        |
| Tubulointerstitial disease                | <b>226</b> | <b>220</b> | <b>200</b> | <b>197</b>  | <b>843</b>  |
|                                           | 43.8       | 31.3       | 22.5       | 15.6        | 25.0        |
| - Renal dysplasia ± reflux                | <b>144</b> | <b>121</b> | <b>100</b> | <b>105</b>  | <b>470</b>  |
|                                           | 27.9       | 17.2       | 11.3       | 8.3         | 13.9        |
| - Obstructive                             | <b>63</b>  | <b>75</b>  | <b>64</b>  | <b>52</b>   | <b>254</b>  |
|                                           | 12.2       | 10.7       | 7.2        | 4.1         | 7.5         |
| - Other tubulointerstitial disease        | <b>19</b>  | <b>24</b>  | <b>36</b>  | <b>40</b>   | <b>119</b>  |
|                                           | 3.7        | 3.4        | 4.1        | 3.2         | 3.5         |
| Miscellaneous renal disorders             | <b>37</b>  | <b>151</b> | <b>215</b> | <b>304</b>  | <b>707</b>  |
|                                           | 7.2        | 21.5       | 24.2       | 24.0        | 21.0        |
| Systemic diseases affecting the kidney    | <b>13</b>  | <b>31</b>  | <b>108</b> | <b>299</b>  | <b>451</b>  |
|                                           | 2.5        | 4.4        | 12.2       | 23.6        | 13.4        |
| - Diabetes                                | <b>0</b>   | <b>6</b>   | <b>49</b>  | <b>220</b>  | <b>275</b>  |
|                                           | 0.0        | 0.9        | 5.5        | 17.4        | 8.2         |
| - Other systemic diseases                 | <b>13</b>  | <b>25</b>  | <b>59</b>  | <b>79</b>   | <b>176</b>  |
|                                           | 2.5        | 3.6        | 6.7        | 6.2         | 5.2         |
| Familial/hereditary nephropathies         | <b>79</b>  | <b>76</b>  | <b>62</b>  | <b>65</b>   | <b>282</b>  |
|                                           | 15.3       | 10.8       | 7.0        | 5.1         | 8.4         |
| - Other familial/hereditary nephropathies | <b>70</b>  | <b>60</b>  | <b>49</b>  | <b>35</b>   | <b>214</b>  |
|                                           | 13.6       | 8.5        | 5.5        | 2.8         | 6.4         |
| - Polycystic kidney disease               | <b>9</b>   | <b>16</b>  | <b>13</b>  | <b>30</b>   | <b>68</b>   |
|                                           | 1.7        | 2.3        | 1.5        | 2.4         | 2.0         |
| Missing                                   | <b>7</b>   | <b>16</b>  | <b>15</b>  | <b>27</b>   | <b>65</b>   |
|                                           | 1.4        | 2.3        | 1.7        | 2.1         | 1.9         |
| Discordant                                | <b>33</b>  | <b>9</b>   | -          | -           | <b>42</b>   |
|                                           | 6.4        | 1.3        | -          | -           | 1.3         |

\*p&lt;0.05, Chi-Square test

\*\*p&lt;0.0001, Chi-Square test

Those aged &gt;21 are only present in the adult database and cannot have discordant data

Supplementary table 3. Transfer to adult services

|                                      | N          | %           | Median      | Range              | Interquartile range |
|--------------------------------------|------------|-------------|-------------|--------------------|---------------------|
| <b>Starting unit type</b>            |            |             |             |                    |                     |
| Adult                                | 2766       | 82.1        |             |                    |                     |
| Paediatric                           | 604        | 17.9        |             |                    |                     |
| <b>Transferred to adult services</b> | <b>568</b> | <b>94.0</b> |             |                    |                     |
| Known to adult Registry              | 553        |             |             |                    |                     |
| Lost (unknown to adult Registry)     | 15         |             |             |                    |                     |
| <b>Not transferred</b>               | <b>35</b>  | <b>5.79</b> |             |                    |                     |
| Remain in Paediatric services        | 20         |             |             |                    |                     |
| Died prior to transfer               | 15         |             |             |                    |                     |
| <b>Transferred overseas</b>          | <b>1</b>   | <b>0.2</b>  |             |                    |                     |
| <b>Age at transfer*</b>              | <b>567</b> |             | <b>18.0</b> | <b>14.8 - 21.2</b> | <b>17.3 - 18.5</b>  |
| 1999-2003                            | 99         | 17.5        | 18.0        | 15.8 - 19.8        | 17.0 - 18.5         |
| 2004-2008                            | 270        | 47.6        | 18.0        | 14.8 - 21.1        | 17.3 - 18.5         |
| 2009-2013                            | 198        | 34.9        | 18.0        | 15.7 - 21.2        | 17.5 - 18.5         |
